# Supplementary material for: Maintaining the Mitochondrial Quality Control System Was a Key Event of Tanshinone IIA against Deoxynivalenol-Induced Intestinal Toxicity
Source: MDPI journal article supplement (doi:10.3390/antiox13010121), 2024-01-18
Supplement: s1 [file s1]

**Table S1. Sequences of oligonucleotide primers for qRT-PCR.**

| Gene Names     | Sequence (5' → 3')                                   | NCBI Reference Sequence | Amplicon size (bp) |
|----------------|------------------------------------------------------|-------------------------|--------------------|
| GAPDH1         | GTCGGAGTGAACGGATTTGGC<br>CTTGCCGTGGGTGGAATCAT        | NM_001289745.3          | 150                |
| Occludin       | GACAGACTACACAACTGGCGG<br>TGTA CTCTGCAGGCCACTG        | NM_001302926.2          | 662                |
| N-Cad          | CTTCATGCTGGTGGTGTCTTGG<br>CACAGTCTTTGGCAGGGCTCAG     | NM_000165.5             | 149                |
| Claudin1       | CCATCGTCAGCACCGCACTG<br>CGACACGCAGGACATCCACAG        | NM_001244539.1          | 107                |
| ZO-1           | CCTGAGTTTGATAGTGGCGTTGA<br>AAATAGATTTCTGCCCCAATTCC   | XM_003353439.2          | 269                |
| SIRT1          | ACTCTCCCTCTTTTAGACCAAGC<br>AAACCTGGACTCTCCATCGG      | NM_001145750.2          | 149                |
| PGC-1 $\alpha$ | ACCAGGACTCTGTATGGACTGA<br>TGAGGGCAATCCGTCTTCAT       | NM_213963.2             | 299                |
| Nrf1           | GGCGGGAGGACCTTTTGTAT<br>ACTGTTGCCCTGTACCAAC          | XM_021079000.1          | 163                |
| SIRT3          | TGTGGTGTCTGTTTCATCTGTTG<br>CTTCCACAGACACCTGAGGC      | NM_001110057.1          | 136                |
| TFAM           | GCTCTCCGTTTCAGTTTTCGCG<br>GGAAGTTCCCTCCACAGCTC       | NM_001130211.1          | 187                |
| OPA1           | ACAGAGGATGGTGCTTGTTGAC<br>CAGTATGATGGCGTTGGGATT      | XM_047448216.1          | 130                |
| Mfn1           | AGAAAGCACAAAGCACAGGGGATG<br>CACTGCTGACTGCGAGATACTC   | XM_011512963.4          | 126                |
| Mfn2           | GCCACACCACCAACTGCTTCC<br>TCTTGACGCTCCTCTTCTCCTCTG    | XM_047436156.1          | 96                 |
| Drp1           | TCTGAATCTGGTGGGCATGATTGC<br>CTCCGCAGTAAAGGACTCGAAGTG | XM_001928848.6          | 91                 |
| Fis1           | CTACCCAAAGGGAGCAAAGAG<br>GTCCAATGAGTCCAGCCAGTC       | NM_016068.3             | 250                |
| Clpp           | CGCTTATGACATCTACTCAC<br>GGGCTTCTTGTTGCTTTC           | XM_003480818.4          | 130                |

| Gene Names | Sequence (5' → 3')                                     | NCBI Reference Sequence | Amplicon size (bp) |
|------------|--------------------------------------------------------|-------------------------|--------------------|
| HSP10      | GCAGCTGAAACGGTAACCAA<br>TCCACCCTTTCCTTTAGAGCC          | NM_214307.1             | 111                |
| HSP60      | CGGATGCTGTAGCCGTTACT<br>ATCCCCAGCCTCTTCGTTTG           | NM_001254716.1          | 191                |
| Htra-2     | GGCCGCGAAGTACCTATCTC<br>GCGTTGGTAACAATGAGCCC           | XM_021087326.1          | 71                 |
| ATF4       | AGTCCTTTTCTGCGAGTGGG<br>CTTCCACAGACACCTGAGGC           | NM_001110057.1          | 80                 |
| Parkin     | GTGGTTCTGCGGTGGATTCTGAG<br>TTRACTGCCTGTGGTTCTTTGGGAAG  | NM_001044603.2          | 104                |
| PINK1      | CAGGAGCGGTCCCAAGCA<br>GTCATCACAGTGGCGAGGC              | NM_032409.3             | 246                |
| LC3        | TGCCCTCAGACCGGCCTTTCAAGCA<br>TCCTTCTCCTGCTCATAGATGTCCG | XM_047440559.1          | 310                |
| FUNDC-1    | GGCAGCACCTGAAATCAACA<br>GCCTAGCAAAAAGCCTCCCA           | XM_003135038.4          | 100                |
| BNIP3      | GACTCGCCAGGTTACAGACA<br>CAGTGACGTGCTTAGGACCC           | XM_003359404.4          | 80                 |
| Beclin1    | GGTTGGATCAGGAGGAAGCT<br>TGTCCACTGTGCCAAATGTG           | NM_001044530.1          | 181                |
| Atg5       | AGAAACCTAGAGAGGGCCACA<br>TCTTCCTAGTCAAACAACGTCA        | NM_001037152.2          | 111                |
| P62        | CGATGGCGATGTCGTATGTG<br>TTGCTGTGCTCCTTGTGAATG          | XM_003123639.4          | 244                |

**Table S2. Total Variance Explained of PCA**

| Component | Total Variance Explained (Mitophagy) |               |         |                                     |        |               |
|-----------|--------------------------------------|---------------|---------|-------------------------------------|--------|---------------|
|           | Initial Eigenvalues                  |               |         | Extraction Sums of Squared Loadings |        |               |
|           | Total                                | % of Variance | Total   | % of Variance                       | Total  | % of Variance |
| 1         | 7.315                                | 91.432        | 91.432  | 7.315                               | 91.432 | 91.432        |
| 2         | .284                                 | 3.548         | 94.980  | .284                                | 3.548  | 94.980        |
| 3         | .145                                 | 1.818         | 96.797  |                                     |        |               |
| 4         | .096                                 | 1.201         | 97.998  |                                     |        |               |
| 5         | .073                                 | .912          | 98.910  |                                     |        |               |
| 6         | .055                                 | .684          | 99.594  |                                     |        |               |
| 7         | .032                                 | .406          | 100.000 |                                     |        |               |
| 8         | -.1539E-16                           | -1.924E-15    | 100.000 |                                     |        |               |

Extraction Method: Principal Component Analysis (PCA).

Figure S1. Original western blot gels used in the study

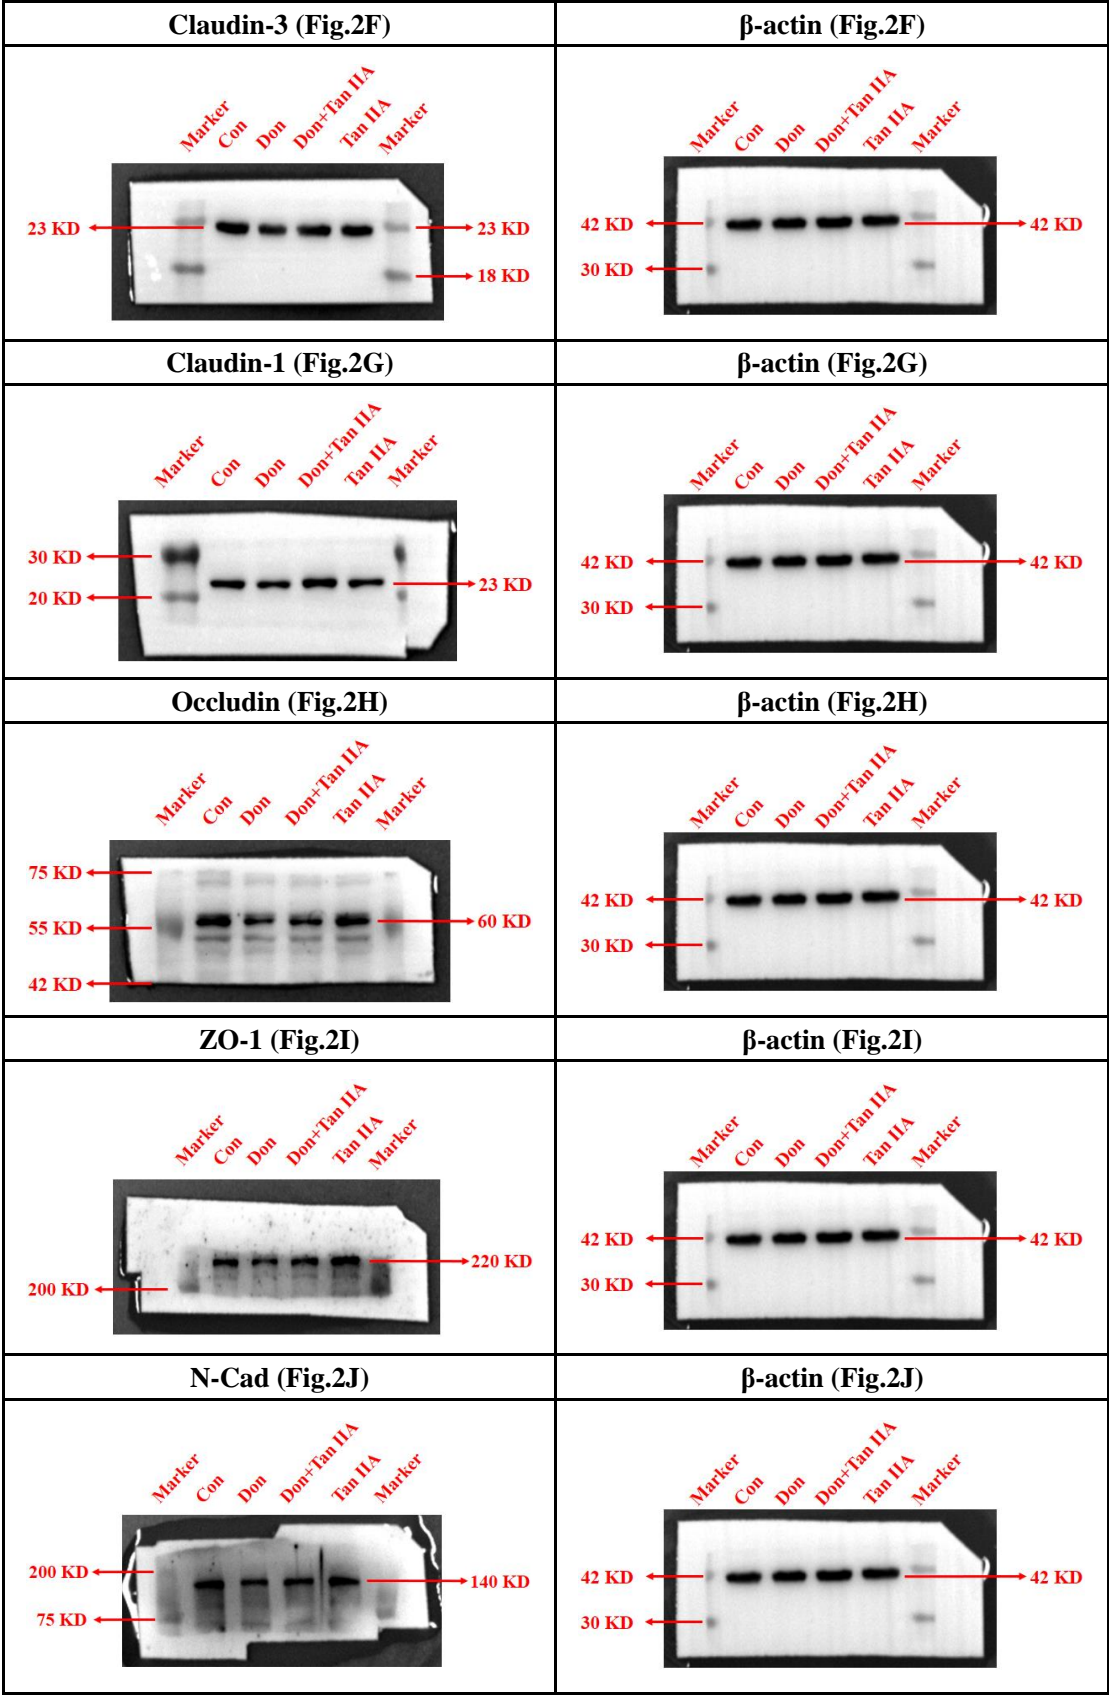

|                                                                                                                   |                                                                                                                     |
|-------------------------------------------------------------------------------------------------------------------|---------------------------------------------------------------------------------------------------------------------|
| <p><b>LC3 I/II (Fig.6A)</b></p> 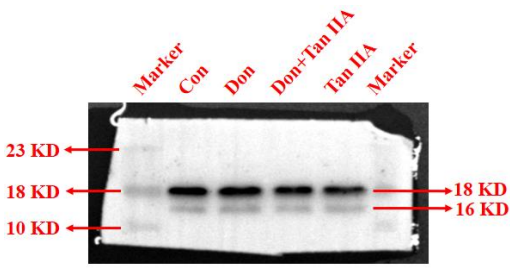 | <p><b>β-actin (Fig.6A)</b></p>    |
| <p><b>Beclin1 (Fig.6B)</b></p>   | <p><b>β-actin (Fig.6B)</b></p>    |
| <p><b>P62 (Fig.6C)</b></p>      | <p><b>β-actin (Fig.6C)</b></p>   |
| <p><b>Parkin (Fig.6D)</b></p>  | <p><b>β-actin (Fig.6D)</b></p>  |
| <p><b>PINK1 (Fig.6E)</b></p>   | <p><b>β-actin (Fig.6E)</b></p>  |
